# Supplementary material for: Screening of Pandemic Response Box Library Reveals the High Activity of Olorofim against Pathogenic Sporothrix Species
Source: MDPI journal article supplement (doi:10.3390/jof8101004), 2022-09-25
Supplement: s1 [file s1]

**Table S1.** Inhibition of *Sporothrix brasiliensis* ATCC MYA 4823 in yeast phase after exposure to 1  $\mu$ M of the Pandemic Response Box compounds.

| <b>Pandemic Response Box Compounds</b> | <b>%Inhibition*</b> | <b>Pandemic Response Box Compounds</b> | <b>%Inhibition*</b> |
|----------------------------------------|---------------------|----------------------------------------|---------------------|
| MMV1634492                             | 98                  | MMV689401                              | 27                  |
| MMV1782108                             | 14                  | MMV1782351                             | 7                   |
| MMV1634494                             | 100                 | MMV1782387                             | 6                   |
| MMV1634386                             | 24                  | MMV1782389                             | 11                  |
| MMV637528                              | 100                 | MMV1782388                             | 3                   |
| MMV1782109                             | 27                  | MMV1634557                             | 13                  |
| MMV1645051                             | 18                  | MMV030787                              | 68                  |
| MMV1634491                             | 93                  | MMV000028                              | 45                  |
| MMV002731                              | 96                  | MMV002722                              | 100                 |
| MMV000059                              | 21                  | MMV1593535                             | 12                  |
| MMV637104                              | 100                 | MMV1593533                             | 4                   |
| MMV637533                              | 100                 | MMV422940                              | 3                   |
| MMV1634362                             | 100                 | MMV1582497                             | 11                  |
| MMV1634360                             | 79                  | MMV1581553                             | 16                  |
| MMV002565                              | 16                  | MMV1581548                             | 10                  |
| MMV396785                              | 100                 | MMV1580850                             | 54                  |
| MMV003143                              | 9                   | MMV002740                              | 12                  |
| MMV002337                              | 10                  | MMV1579783                             | 30                  |
| MMV1634363                             | 11                  | MMV1578925                             | 57                  |
| MMV1634359                             | 100                 | MMV1578889                             | 19                  |
| MMV1782110                             | 30                  | MMV1578572                             | 21                  |
| MMV1634493                             | 100                 | MMV1578568                             | 20                  |
| MMV344625                              | 15                  | MMV1580173                             | 16                  |
| MMV1634358                             | 81                  | MMV1634403                             | 10                  |
| MMV1578560                             | 6                   | MMV1634390                             | 11                  |
| MMV640014                              | 79                  | MMV1633967                             | 14                  |
| MMV004508                              | 43                  | MMV1593534                             | 16                  |
| MMV1782212                             | 10                  | MMV1582498                             | 12                  |
| MMV1782227                             | 11                  | MMV1582494                             | 27                  |
| MMV1782226                             | 8                   | MMV1582493                             | 61                  |
| MMV1782221                             | 11                  | MMV000043                              | 29                  |
| MMV1782224                             | 100                 | MMV003137                              | 46                  |
| MMV1782223                             | 16                  | MMV1581552                             | 57                  |
| MMV1782218                             | 21                  | MMV1581551                             | 13                  |
| MMV1782217                             | 24                  | MMV1580853                             | 10                  |
| MMV1782216                             | 30                  | MMV1580841                             | 8                   |
| MMV1009286                             | 21                  | MMV1579878                             | 14                  |
| MMV1782225                             | 64                  | MMV1579845                             | 21                  |
| MMV1782354                             | 100                 | MMV1579787                             | 27                  |

\*Mean of three independent experiments performed in duplicate.

Continuation of Table S1.

| Pandemic Response Box Compounds | %Inhibition* | Pandemic Response Box Compounds | %Inhibition* |
|---------------------------------|--------------|---------------------------------|--------------|
| MMV1579784                      | 80           | MMV002459                       | 16           |
| MMV1483032                      | 13           | MMV637945                       | 4            |
| MMV508427                       | 4            | MMV1580854                      | 1            |
| MMV1578565                      | 6            | MMV1580851                      | 1            |
| MMV1578561                      | 21           | MMV1579849                      | 1            |
| MMV1578557                      | 12           | MMV1579844                      | 48           |
| MMV000725                       | 13           | MMV141011                       | 41           |
| MMV1634384                      | 13           | MMV002516                       | 6            |
| MMV1634383                      | 24           | MMV688755                       | 21           |
| MMV1613560                      | 23           | MMV020752                       | 15           |
| MMV1230557                      | 7            | MMV1229204                      | 5            |
| MMV1593540                      | 0            | MMV1578575                      | 13           |
| MMV1593539                      | 3            | MMV1578556                      | 1            |
| MMV1582495                      | 5            | MMV1663457                      | 9            |
| MMV1582487                      | 7            | MMV1341773                      | 3            |
| MMV021759                       | 5            | MMV1633970                      | 7            |
| MMV1581555                      | 8            | MMV1633965                      | 5            |
| MMV1581547                      | 12           | MMV093250                       | 13           |
| MMV687800                       | 11           | MMV1593541                      | 2            |
| MMV1580848                      | 13           | MMV1593537                      | 13           |
| MMV1580842                      | 27           | MMV1582492                      | 11           |
| MMV1580840                      | 12           | MMV1582491                      | 8            |
| MMV046261                       | 11           | MMV1582382                      | 10           |
| MMV1579846                      | 12           | MMV002354                       | 5            |
| MMV1578842                      | 0            | MMV1581557                      | 10           |
| MMV1579776                      | 9            | MMV1581554                      | 46           |
| MMV1579775                      | 8            | MMV1581550                      | 14           |
| MMV1579354                      | 10           | MMV1581546                      | 16           |
| MMV1578899                      | 12           | MMV1580844                      | 29           |
| MMV1578890                      | 12           | MMV1579788                      | 87           |
| MMV1578886                      | 10           | MMV1579785                      | 12           |
| MMV1578573                      | 22           | MMV811071                       | 18           |
| MMV1578571                      | 26           | MMV1578898                      | 7            |
| MMV687273                       | 24           | MMV1549626                      | 29           |
| MMV1634387                      | 28           | MMV1578559                      | 31           |
| MMV1633966                      | 29           | MMV1578579                      | 31           |
| MMV1505642                      | 20           | MMV1578578                      | 30           |
| MMV1593542                      | 21           | MMV1578574                      | 23           |
| MMV1593538                      | 20           | MMV1578569                      | 20           |

\*Mean of three independent experiments performed in duplicate.

Continuation of Table S1.

| Pandemic Response Box Compounds | %Inhibition* | Pandemic Response Box Compounds | %Inhibition* |
|---------------------------------|--------------|---------------------------------|--------------|
| MMV1578563                      | 21           | MMV1579847                      | 10           |
| MMV1578558                      | 11           | MMV1579782                      | 1            |
| MMV1782140                      | 83           | MMV1579777                      | 3            |
| MMV1634391                      | 18           | MMV292173                       | 5            |
| MMV1633674                      | 22           | MMV102270                       | 5            |
| MMV002169                       | 7            | MMV000008                       | 11           |
| MMV002612                       | 13           | MMV002260                       | 7            |
| MMV1613562                      | 18           | MMV102833                       | 18           |
| MMV689758                       | 34           | MMV565773                       | 52           |
| MMV1593532                      | 20           | MMV1578577                      | 9            |
| MMV002224                       | 14           | MMV233495                       | 10           |
| MMV637659                       | 5            | MMV002676                       | 3            |
| MMV1580846                      | 12           | MMV1633675                      | 3            |
| MMV1580845                      | 14           | MMV303733                       | 3            |
| MMV1579850                      | 10           | MMV003249                       | 0            |
| MMV374187                       | 8            | MMV001438                       | 2            |
| MMV1579781                      | 11           | MMV1582496                      | 1            |
| MMV1579780                      | 5            | MMV1582490                      | 10           |
| MMV688756                       | 14           | MMV1582489                      | 1            |
| MMV1578897                      | 22           | MMV1582488                      | 11           |
| MMV001014                       | 25           | MMV002665                       | 10           |
| MMV1578885                      | 19           | MMV1581559                      | 11           |
| MMV687696                       | 9            | MMV1581545                      | 0            |
| MMV011565                       | 8            | MMV1580855                      | 2            |
| MMV452821                       | 10           | MMV1580852                      | 4            |
| MMV1578576                      | 8            | MMV1580849                      | 10           |
| MMV1578562                      | 12           | MMV1580839                      | 4            |
| MMV1578555                      | 10           | MMV1579779                      | 3            |
| MMV1578554                      | 9            | MMV1579778                      | 2            |
| MMV1634402                      | 8            | MMV099714                       | 3            |
| MMV1634399                      | 42           | MMV1578891                      | 0            |
| MMV000051                       | 13           | MMV124656                       | 12           |
| MMV002287                       | 30           | MMV975972                       | 17           |
| MMV831201                       | 21           | MMV1578884                      | 13           |
| MMV687801                       | 11           | MMV108465                       | 9            |
| MMV1593531                      | 17           | MMV1480967                      | 8            |
| MMV1581558                      | 13           | MMV1578570                      | 11           |
| MMV1581556                      | 14           | MMV1578564                      | 17           |
| MMV1581549                      | 10           | MMV1782215                      | 8            |

\*Mean of three independent experiments performed in duplicate.

Continuation of Table S1.

| Pandemic Response Box Compounds | %Inhibition* | Pandemic Response Box Compounds | %Inhibition* |
|---------------------------------|--------------|---------------------------------|--------------|
| MMV1782402                      | 10           | MMV639951                       | 46           |
| MMV1782411                      | 15           | MMV1580491                      | 10           |
| MMV214956                       | 25           | MMV1580492                      | 11           |
| MMV1634395                      | 11           | MMV690621                       | 8            |
| MMV1634071                      | 14           | MMV1782112                      | 0            |
| MMV1633962                      | 19           | MMV1782107                      | 18           |
| MMV1633678                      | 23           | MMV1782106                      | 26           |
| MMV690480                       | 19           | MMV1782105                      | 28           |
| MMV1593517                      | 29           | MMV1782104                      | 38           |
| MMV1593515                      | 21           | MMV1782101                      | 24           |
| MMV1581032                      | 24           | MMV1633969                      | 3            |
| MMV1580799                      | 4            | MMV596723                       | 0            |
| MMV001726                       | 14           | MMV1581378                      | 0            |
| MMV690653                       | 16           | MMV1581031                      | 0            |
| MMV1580484                      | 10           | MMV1580797                      | 1            |
| MMV1580478                      | 14           | MMV001761                       | 1            |
| MMV1782102                      | 11           | MMV002015                       | 7            |
| MMV394033                       | 20           | MMV056052                       | 16           |
| MMV1634404                      | 20           | MMV1580504                      | 26           |
| MMV1634388                      | 20           | MMV001961                       | 30           |
| MMV180402                       | 27           | MMV003738                       | 34           |
| MMV642550                       | 83           | MMV690540                       | 38           |
| MMV1580798                      | 13           | MMV614278                       | 25           |
| MMV1580800                      | 16           | MMV1580489                      | 15           |
| MMV1580503                      | 17           | MMV1580499                      | 14           |
| MMV690547                       | 15           | MMV1782115                      | 14           |
| MMV1165877                      | 12           | MMV1782114                      | 19           |
| MMV1580497                      | 23           | MMV018362                       | 17           |
| MMV1580495                      | 21           | MMV1634556                      | 24           |
| MMV1645152                      | 23           | MMV1634401                      | 31           |
| MMV1633677                      | 29           | MMV1634394                      | 43           |
| MMV1593520                      | 26           | MMV1633964                      | 45           |
| MMV1581029                      | 31           | MMV1593516                      | 43           |
| MMV1580794                      | 23           | MMV1593513                      | 43           |
| MMV001793                       | 22           | MMV1593511                      | 43           |
| MMV251679                       | 17           | MMV637306                       | 42           |
| MMV003291                       | 20           | MMV1581377                      | 43           |
| MMV009948                       | 27           | MMV002780                       | 40           |
| MMV1174026                      | 18           | MMV1580801                      | 45           |

\*Mean of three independent experiments performed in duplicate.

Continuation of Table S1.

| Pandemic Response Box Compounds | %Inhibition* | Pandemic Response Box Compounds | %Inhibition* |
|---------------------------------|--------------|---------------------------------|--------------|
| MMV637879                       | 46           | MMV1634389                      | 34           |
| MMV617332                       | 15           | MMV1581035                      | 3            |
| MMV1580480                      | 8            | MMV1593544                      | 3            |
| MMV1580494                      | 12           | MMV1593521                      | 6            |
| MMV275100                       | 13           | MMV1593514                      | 5            |
| MMV1782103                      | 20           | MMV1581036                      | 6            |
| MMV1782098                      | 17           | MMV1581030                      | 15           |
| MMV1634397                      | 22           | MMV247764                       | 14           |
| MMV1633963                      | 27           | MMV019724                       | 90           |
| MMV1593519                      | 17           | MMV638198                       | 23           |
| MMV002505                       | 17           | MMV637413                       | 8            |
| MMV1581034                      | 11           | MMV658803                       | 6            |
| MMV1581033                      | 12           | MMV1580500                      | 7            |
| MMV1557856                      | 14           | MMV1580498                      | 2            |
| MMV1580796                      | 88           | MMV1580488                      | 30           |
| MMV1580505                      | 20           | MMV1580486                      | 10           |
| MMV687798                       | 23           | MMV1782222                      | 12           |
| MMV003297                       | 20           | MMV690706                       | 24           |
| MMV1580487                      | 26           | MMV1782220                      | 16           |
| MMV1580485                      | 26           | MMV1782213                      | 20           |
| MMV098836                       | 43           | MMV1782214                      | 14           |
| MMV218827                       | 12           | MMV1782211                      | 36           |
| MMV1782111                      | 18           | MMV1782210                      | 18           |
| MMV1782097                      | 20           | MMV1782208                      | 20           |
| MMV1634398                      | 25           | MMV1006203                      | 17           |
| MMV1634396                      | 17           | MMV1782353                      | 14           |
| MMV1634385                      | 23           | MMV1782349                      | 19           |
| MMV1633968                      | 25           | MMV1782355                      | 17           |
| MMV688991                       | 19           | MMV1782352                      | 9            |
| MMV1580502                      | 44           | MMV1782350                      | 19           |
| MMV637855                       | 30           | MMV1782386                      | 29           |
| MMV690467                       | 32           | MMV1782412                      | 31           |
| MMV1580493                      | 47           | MMV1613563                      | 31           |
| MMV1580482                      | 35           | MMV1580843                      | 38           |
| MMV1580501                      | 28           | MMV690555                       | 21           |
| MMV1580496                      | 35           | MMV1613559                      | 13           |
| MMV1580490                      | 30           | MMV1634361                      | 17           |
| MMV1782113                      | 31           | MMV002350                       | 18           |
| MMV1634393                      | 30           | MMV1580483                      | 20           |

\*Mean of three independent experiments performed in duplicate.
